# Supplementary material
Source: Springer Nature journal article supplement (https://www.springermedizin.de/resource/supplementary/12933_2010_272_MOESM5_ESM.pdf/9539988)

Percent of all patients on oral monotherapy (68.6%)

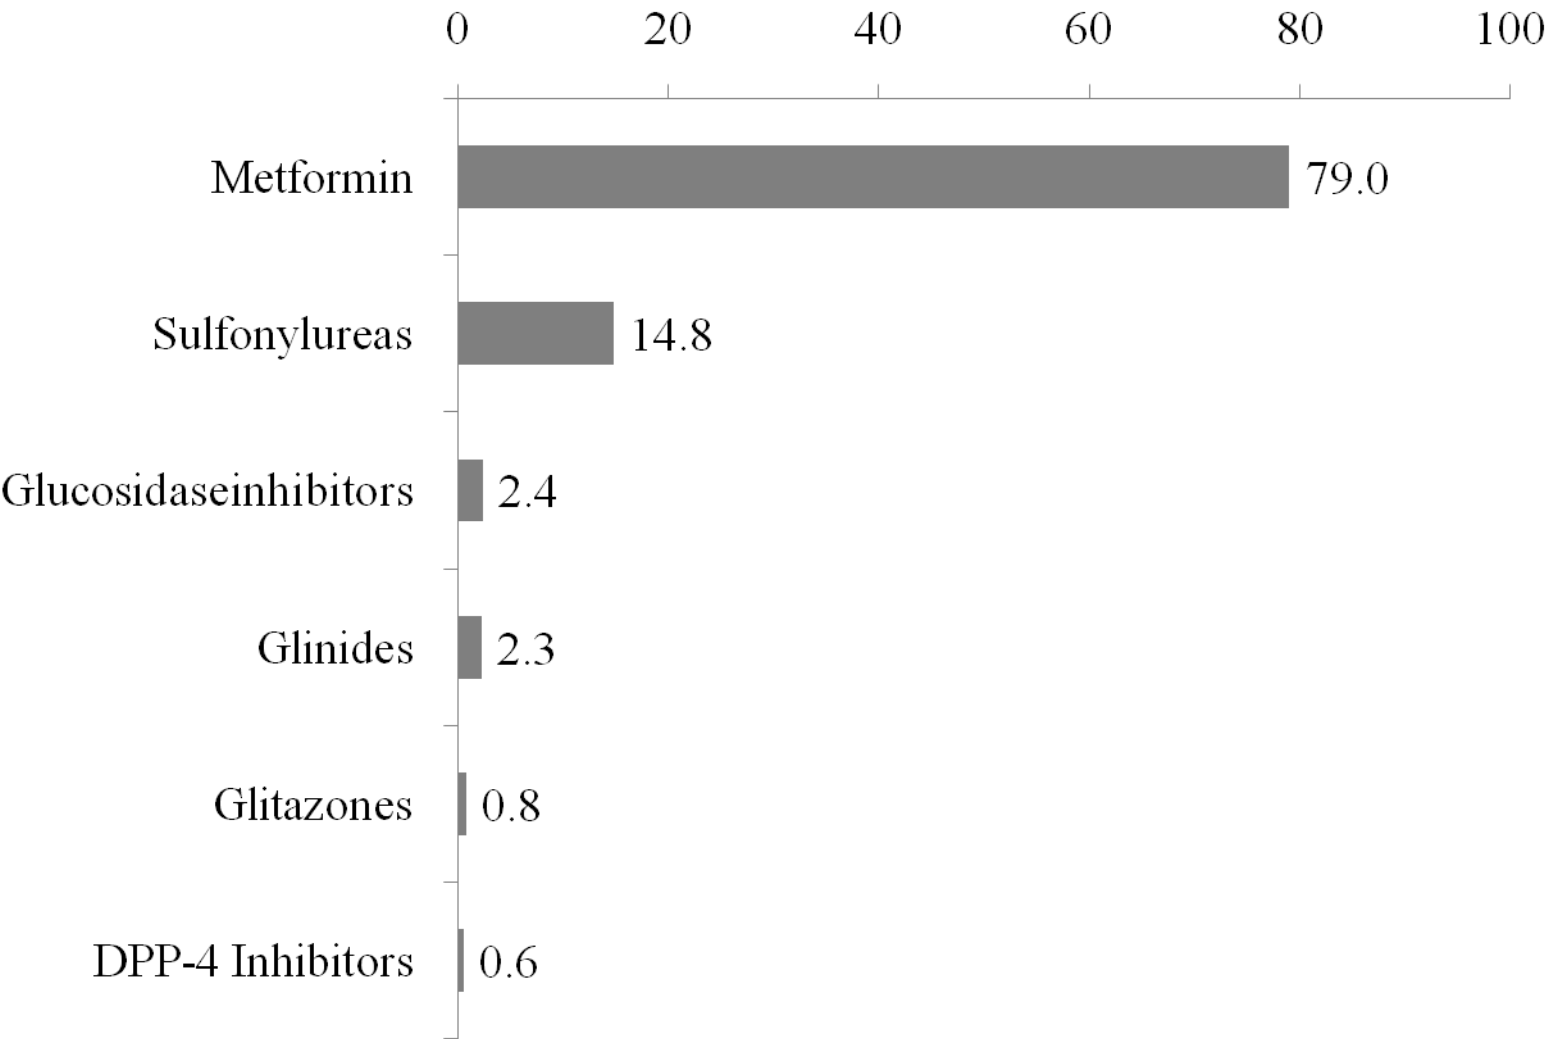

Percent of all patients on dual oral combination therapy (31.4%)

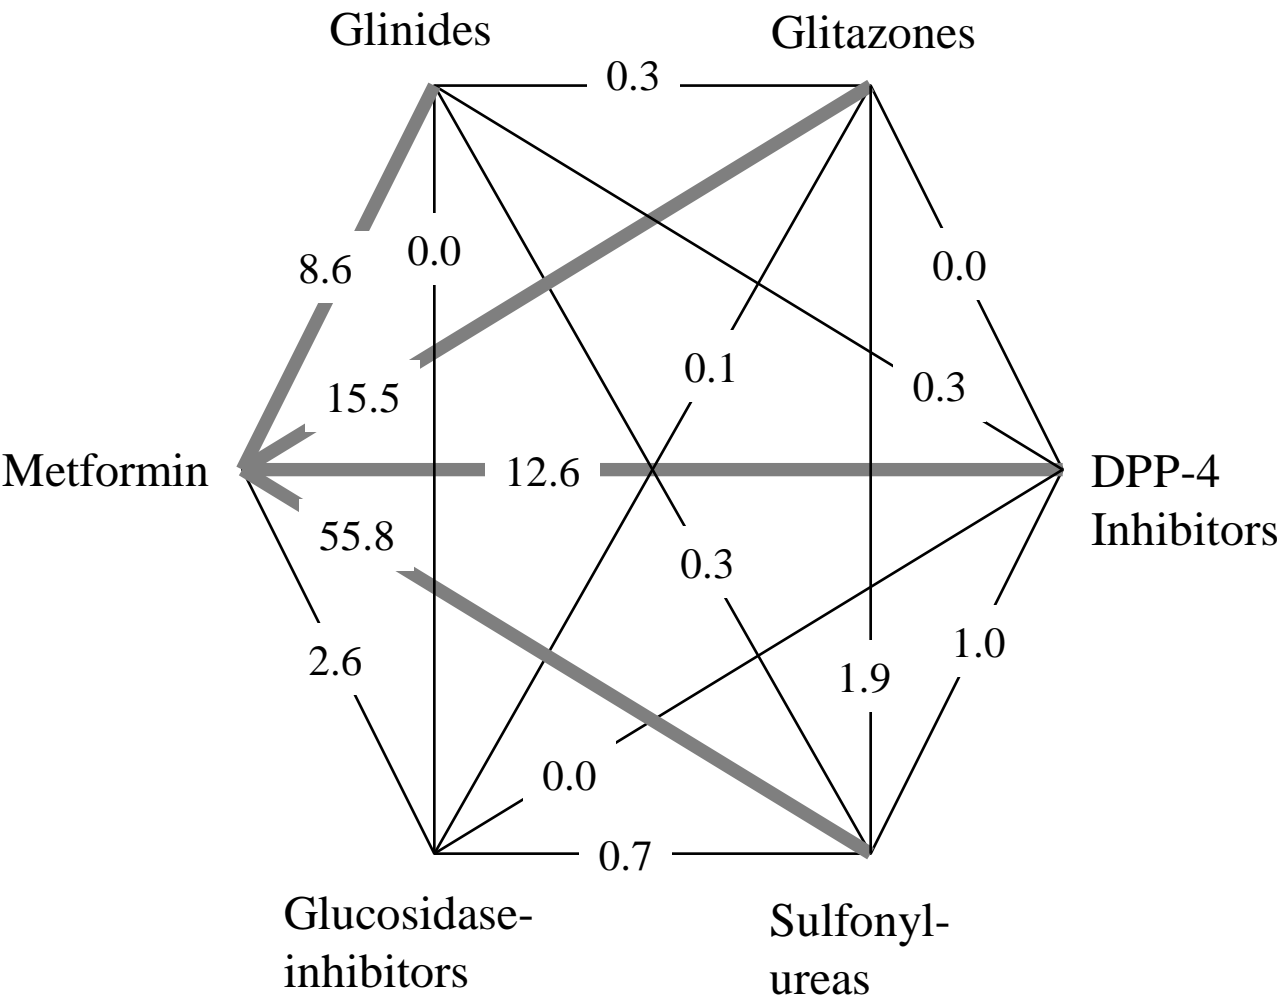

Supplement: MOESM5 [file 9539988]
